# Supplementary material for: Quantification of Above-Ground Biomass over the Cross-River State, Nigeria, Using Sentinel-2 Data
Source: MDPI journal article supplement (doi:10.3390/rs14225741), 2022-11-13
Supplement: s1 [file s1]

Archive with 1 entries (1 files):
- remotesensing-1996932-supplementary.pdf
