# Supplementary figures and images for: Quantification of Above-Ground Biomass over the Cross-River State, Nigeria, Using Sentinel-2 Data
Source: MDPI journal article supplement (doi:10.3390/rs14225741), 2022-11-13

Supplementary material S1: Estimated AGB over Cross River State, Nigeria.

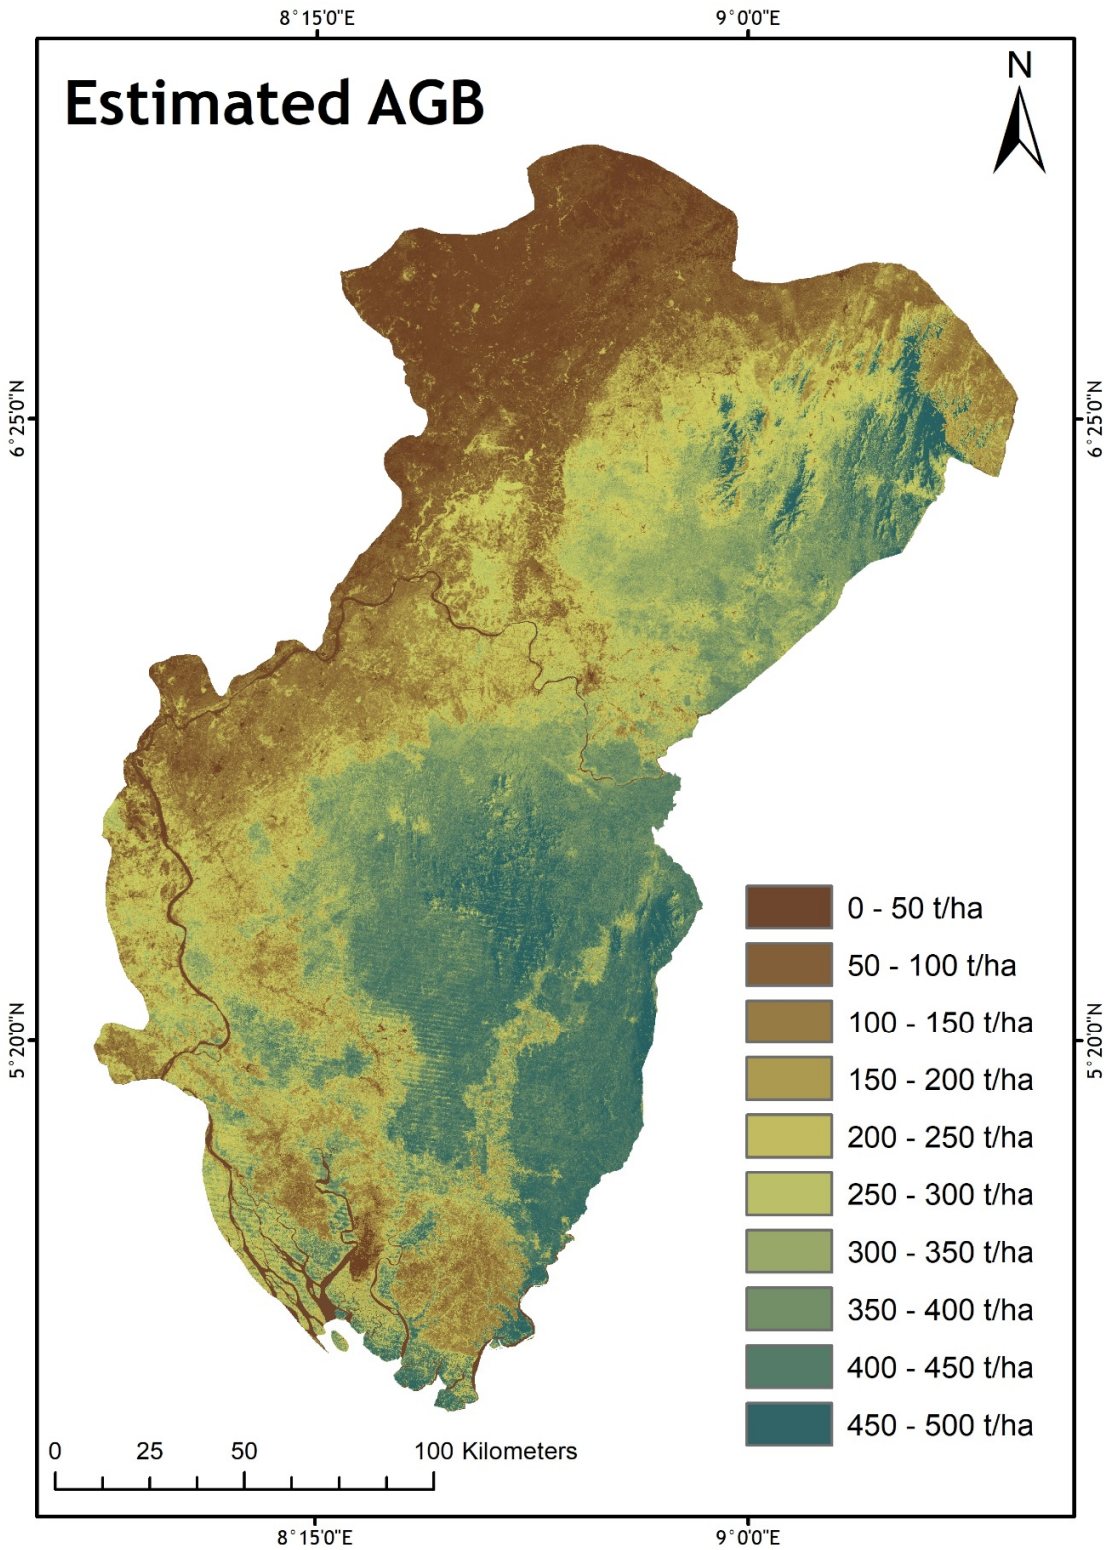

Supplement: s1 [file s1 › remotesensing-1996932-supplementary.pdf]
